# Supplementary material for: Ferromagnetism in polynuclear systems based on non-linear [MnII2MnIII] building blocks
Source: Royal Society of Chemistry journal article supplement (doi:10.1039/c6qi00189k), 2016-01-01
Supplement: c6qi00189k1.pdf [file c6qi00189k1.pdf]

## Electronic Supplementary Information

### Ferromagnetism in polynuclear systems based on non-linear $[\text{Mn}^{\text{II}}_2\text{Mn}^{\text{III}}]$ building blocks

Jordi Cirera,<sup>†</sup> Yuan Jiang,<sup>‡</sup> Lei Qin,<sup>§</sup> Yan-Zhen Zheng,<sup>§</sup> Guanghua Li,<sup>‡</sup> Gang Wu,<sup>‡\*</sup> Eliseo Ruiz<sup>\*\*</sup>

<sup>†</sup> Departament de Química Inorgànica i Orgànica and Institut de Química Teòrica i Computacional, Universitat de Barcelona, Diagonal 645, 08028 Barcelona, Spain.

<sup>‡</sup> State Key Laboratory of Inorganic Synthesis & Preparative Chemistry, Jilin University, 2699 Qianjin Street, Changchun 130012, China

<sup>§</sup> Centre for Applied Chemical Research, Frontier Institute of Science and Technology, Xi'an Jiaotong University, Xi'an 710054, China

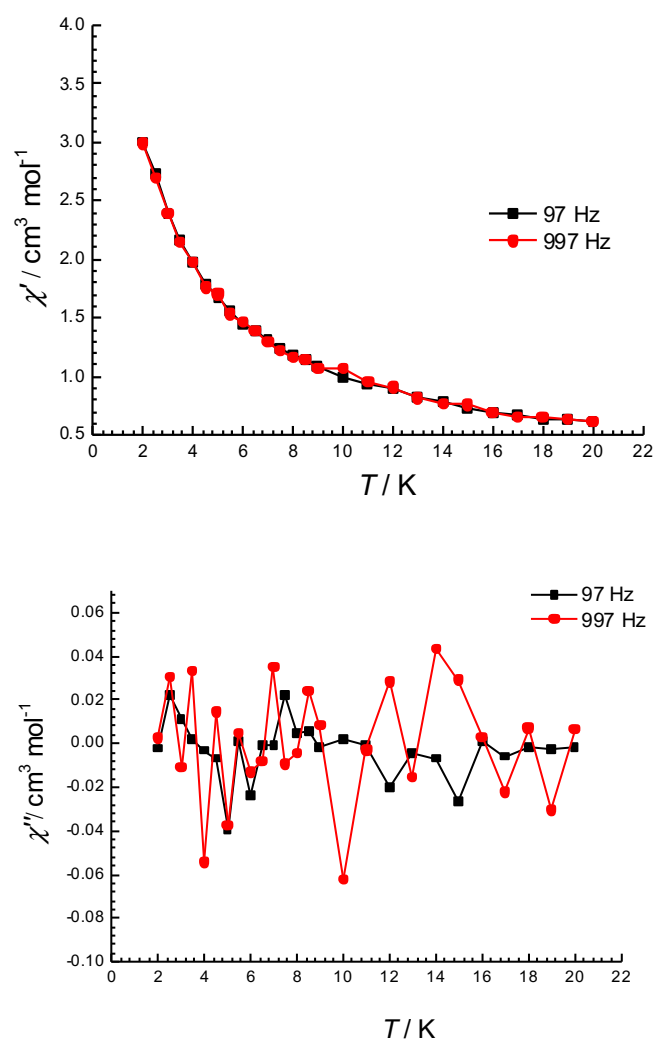

**Fig. S1** AC susceptibilities under 0 Oe dc field for **4** at indicated frequencies.

**Table S1** Spin distributions and energies for systems **1, 3** and **4****Complex 1**

|     | Mn <sub>1</sub> <sup>II</sup> | Mn <sub>2</sub> <sup>III</sup> | Mn <sub>3</sub> <sup>II</sup> | Energy/a.u.    |
|-----|-------------------------------|--------------------------------|-------------------------------|----------------|
| HS  | 4.85                          | 3.84                           | 4.85                          | -16093.4187913 |
| SD1 | 4.83                          | -3.74                          | 4.83                          | -16093.4175044 |
| SD2 | 4.85                          | 3.79                           | -4.83                         | -16093.4181215 |

**Complex 3**

|      | Mn <sub>1</sub> <sup>II</sup> | Mn <sub>2</sub> <sup>III</sup> | Mn <sub>3</sub> <sup>II</sup> | Mn <sub>4</sub> <sup>II</sup> | Mn <sub>5</sub> <sup>III</sup> | Mn <sub>6</sub> <sup>II</sup> | Energy/a.u.    |
|------|-------------------------------|--------------------------------|-------------------------------|-------------------------------|--------------------------------|-------------------------------|----------------|
| HS   | 4.82                          | 3.85                           | 4.83                          | 4.83                          | 3.85                           | 4.82                          | -15501.6921053 |
| SD1  | 4.80                          | -3.84                          | 4.81                          | 4.81                          | -3.84                          | 4.80                          | -15501.6885574 |
| SD2  | 4.82                          | 3.79                           | -4.81                         | -4.81                         | 3.79                           | 4.82                          | -15501.6906334 |
| SD3  | -4.80                         | 3.88                           | 4.83                          | 4.83                          | 3.87                           | -4.80                         | -15501.6899758 |
| SD4  | 4.80                          | -3.72                          | 4.78                          | -4.78                         | 3.72                           | -4.80                         | -15501.6891663 |
| SD5  | 4.81                          | 3.94                           | 4.81                          | -4.81                         | -3.93                          | -4.81                         | -15501.6927395 |
| SD6  | -4.82                         | -3.86                          | -4.81                         | 4.81                          | 3.94                           | 4.82                          | -15501.6927395 |
| SD7  | 4.80                          | -3.84                          | 4.81                          | 4.83                          | 3.93                           | 4.81                          | -15501.6903317 |
| SD8  | 4.81                          | 3.92                           | 4.83                          | 4.81                          | -3.84                          | 4.81                          | -15501.6903323 |
| SD9  | -4.80                         | 3.78                           | 4.83                          | 4.83                          | 3.84                           | 4.82                          | -15501.6910414 |
| SD10 | 4.82                          | 3.78                           | -4.78                         | 4.81                          | 3.86                           | 4.82                          | -15501.6919915 |

**Complex 4**

|     | Mn <sub>1</sub> <sup>II</sup> | Mn <sub>2</sub> <sup>III</sup> | Mn <sub>3</sub> <sup>II</sup> | Energy/a.u.    |
|-----|-------------------------------|--------------------------------|-------------------------------|----------------|
| HS  | 4.86                          | 3.86                           | 4.82                          | -7771.68120338 |
| SD1 | 4.85                          | -3.74                          | 4.81                          | -7771.67919897 |
| SD2 | 4.86                          | 3.80                           | -4.81                         | -7771.68030238 |
| SD3 | -4.82                         | 3.80                           | 4.82                          | -7771.68006868 |

**Table S2** Experimental J values (in cm<sup>-1</sup>), Mn-O-Mn angles (in degrees), coordination number of the Mn<sup>II</sup> and Mn<sup>III</sup> centres of reported double-bridged alkoxo or phenoxo Mn<sup>II</sup>...Mn<sup>III</sup> complexes.

| Compound                                                                                                                                           | J <sub>exp</sub> | Mn-O-Mn                      | Coord. Num. | Refcode | ref. |
|----------------------------------------------------------------------------------------------------------------------------------------------------|------------------|------------------------------|-------------|---------|------|
| <b>Dinuclear complexes</b>                                                                                                                         |                  |                              |             |         |      |
| <b>Phenoxo-alkoxo bridging ligands</b>                                                                                                             |                  |                              |             |         |      |
| [Mn <sup>III</sup> (L <sub>1</sub> )(CH <sub>3</sub> OH)(OCH <sub>3</sub> )Mn <sup>II</sup> Cl <sub>2</sub> ]·CH <sub>3</sub> OH                   | +6.0             | 106.17/103.29                | 5/6         | CAFHOG  | 1    |
| [Mn <sup>II</sup> Mn <sup>III</sup> (L)(μ-OMe)Br <sub>2</sub> ]                                                                                    | +2.9             | 103.67/104.17                | 6/6         | RETWOE  | 2    |
| [Mn <sup>II</sup> Mn <sup>III</sup> (L)(μ-OMe)Br <sub>2</sub> ]                                                                                    | +3.7             | 104.11/105.12                | 6/6         | RETWUK  | 2    |
| [Mn <sup>II</sup> Mn <sup>III</sup> (L)(μ-OMe)Cl <sub>2</sub> ]                                                                                    | +2.15            | 104.18/105.27                | 6/6         | RETXEV  | 2    |
| [Mn <sup>II</sup> Mn <sup>III</sup> (L)(μ-OMe)Cl <sub>2</sub> ]                                                                                    | +4.2             | 103.42/104.38                | 6/6         | RETXIZ  | 2    |
| [Mn <sup>II</sup> Mn <sup>III</sup> (L)(μ-OMe)Cl <sub>2</sub> ]                                                                                    | +3.44            | 103.76/103.96                | 6/6         | RETXOF  | 2    |
| (TEA)[Mn <sup>II</sup> Mn <sup>III</sup> (2-OH(5-Clisal)pn) <sub>2</sub> ]                                                                         | +0.5             | 103.82/103.97                | 6/6         | ROCRAC  | 3    |
| <b>Trinuclear</b>                                                                                                                                  |                  |                              |             |         |      |
| <b>Bisdialkoxo and bisalkoxophenoxo bridges</b>                                                                                                    |                  |                              |             |         |      |
| [Mn <sup>III</sup> Mn <sub>2</sub> <sup>II</sup> (Hcht) <sub>2</sub> (bpy) <sub>4</sub> ](ClO <sub>4</sub> ) <sub>3</sub> ·Et <sub>2</sub> O·2MeCN | +3.2             | 102.00                       | 6/6         | WANHUP  | 4    |
| [Mn <sup>III</sup> Mn <sub>2</sub> <sup>II</sup> (L)(μ-OMe) <sub>2</sub> ](ClO <sub>4</sub> ) <sub>3</sub>                                         | +3.6             | 96.62/107.68<br>96.83/107.97 | 6/6         | QAXZUK  | 5    |

## References

1. M. Hirotsu, M. Kojima, W. Mori and Y. Yoshikawa, *Bull. Chem. Soc. Jpn.*, 1998, **71**, 2873-2884.
2. M. M. Hanninen, J. Valivaara, A. J. Mota, E. Coacio, F. Lloret and R. Sillanpaa, *Inorg. Chem.*, 2013, **52**, 2228-2241.
3. A. Gelasco, M. L. Kirk, J. W. Kampf and V. L. Pecoraro, *Inorg. Chem.*, 1997, **36**, 1829-1837.
4. R. T. W. Scott, S. Parsons, M. Murugesu, W. Wernsdorfer, G. Christou and E. K. Brechin, *Chem. Commun.*, 2005, 2083-2085.
5. A. Yoshino, T. Miyagi, E. Asato, M. Mikuriya, Y. Sakata, K. Sugiura, K. Iwasaki, S. Hino and D. Hino, *Chem. Commun.*, 2000, 1475-1476.
